# Supplementary material for: Rationale and strategies for improving glycaemic control in diabetic patients undergoing cardiac surgery: a narrative review
Source: PubMed Central journal article supplement — J Thorac Dis. 2024 Nov 6;16(11):8088–102. doi: 10.21037/jtd-24-1112 (PMC11635245; doi:10.21037/jtd-24-1112), 2024-11-06
Supplement: jtd-16-11-8088-rc.pdf [file jtd-16-11-8088-rc.pdf]

## Narrative Review Checklist

| Section/Topic             | Item No | Item                                                                                                                                                                               | Reported on Page Number/Line Number | Reported on Section/Paragraph |
|---------------------------|---------|------------------------------------------------------------------------------------------------------------------------------------------------------------------------------------|-------------------------------------|-------------------------------|
| <b>TITLE</b>              |         |                                                                                                                                                                                    |                                     |                               |
| Title                     | 1       | Identify the report as a Narrative Review or Literature Review.                                                                                                                    | Page 1, 1-2                         | Title page                    |
| <b>ABSTRACT</b>           |         |                                                                                                                                                                                    |                                     |                               |
| Structured summary        | 2       | Provide a structured summary with the subsections as: Background and Objective, Methods, Key Content and Findings, Conclusion.                                                     | Page 2, Lines 33-64                 | Abstract, Para 1-4            |
| <b>INTRODUCTION</b>       |         |                                                                                                                                                                                    |                                     |                               |
| Rationale/background      | 3       | Describe the rationale for the review in the context of what is already known.                                                                                                     | Page 3-4, Lines 68-125              | Introduction, Para 1-7        |
| Objectives                | 4       | Specify the key question(s) identified for the review topic.                                                                                                                       | Page 5, Lines 128-132               | Introduction, Para 3          |
| <b>METHODS</b>            |         |                                                                                                                                                                                    |                                     |                               |
| Research selection        | 5       | Specify the process for identifying the literature search (eg, years considered, language, publication status, study design, and databases of coverage).                           | Page 5, Lines 136-143               | Methods, Para 1-2             |
| <b>DISCUSSION/SUMMARY</b> |         |                                                                                                                                                                                    |                                     |                               |
| Narrative                 | 6       | Discuss: 1) research reviewed including fundamental or key findings, 2) limitations and/or quality of research reviewed, and 3) need for future research.                          | Pages 5-19, Lines 147-462           | Various subheadings           |
| Summary                   | 7       | Provide an overall interpretation of the narrative review in the context of clinical practice for health professionals, policy development and implementation, or future research. | Pages 19, Lines 466-483             | Conclusion, Para 1-3          |

Article Information: <https://dx.doi.org/10.21037/jtd-24-1112>

\*As the checklist was provided upon initial submission, the page number/line number reported may be changed due to copyediting and may not be referable in the published version. In this case, the section/paragraph may be used as an alternative reference.
